# Supplementary material for: Injectable silver nanosensors: in vivo dosimetry for external beam radiotherapy using positron emission tomography
Source: Royal Society of Chemistry journal article supplement (doi:10.1039/c6nr00201c), 2016-01-01
Supplement: c6nr00201c1.pdf [file c6nr00201c1.pdf]

## Supporting Information

### **Injectable Silver Nanosensors: *In Vivo* Dosimetry for External Beam Radiotherapy using Positron Emission Tomography**

Anders Nymark Christensen<sup>a</sup>, Jonas Scherman Rydhög<sup>b</sup>, Rikke V. Søndergaard<sup>c</sup>, Thomas L. Andresen<sup>c</sup>, Søren Holm<sup>d</sup>, Per Munck af Rosenschöld<sup>b</sup>, Knut Conradsen<sup>a</sup>, Rasmus Irming Jølck<sup>c, \*</sup>

<sup>a</sup> DTU Compute, Department of Applied Mathematics and Computer Science, Technical University of Denmark, Building 321/324, Matematiktorvet, 2800 Kgs. Lyngby, Denmark

<sup>b</sup> Department of Oncology, Section of Radiotherapy, 3994, Rigshospitalet, Blegdamsvej 9, 2100 Copenhagen, Denmark and The Niels Bohr Institute, University of Copenhagen, Blegdamsvej 17, 2100 Copenhagen, Denmark

<sup>c</sup> DTU Nanotech, Department of Micro-and Nanotechnology, Center for Nanomedicine and Theranostics, Technical University of Denmark, Building 423, 2800 Kgs. Lyngby, Denmark

<sup>d</sup> Department of Clinical Physiology, Nuclear Medicine and PET, Rigshospitalet, Blegdamsvej 9, 2100 Copenhagen, Denmark

---

\* Corresponding author. E-mail: [rasj@nanotech.dtu.dk](mailto:rasj@nanotech.dtu.dk), Fax number: +45 45 88 77 62

# 1. Thorax Phantom Setup Plan

Irradiation of the thorax phantom was performed by using two different Ag-nanosensor configurations where Ag-nanosensor #1-4 was used in the first configuration (I) and Ag-nanosensor #5-8 was used in the second configuration (II) (Table S1). Each dose level was irradiated and measured with the PET/CT three times. Delay between individual irradiations was minimum 24h equal to 60.1 half-lives of  $^{106}\text{Ag}$  to prevent carry-over of radioactivity. In total 45 individual measurements were conducted, which were divided into 36 of Ag-nanosensors and 9 of the control gel.

**Table S1: Experimental plan with gels configuration.**

| Scan\Dose [Gy] | 2  | 10 | 22 |
|----------------|----|----|----|
| 1              | I  | II | I  |
| 2              | I  | II | I  |
| 3              | II | I  | II |

## 2. Statistical Analysis

### 2.1 Ag-Nanosensor Variance Analysis

To analyze possible effects of the individual gels, the position in the phantom, and the irradiated dose, a model with second order interactions was considered:

$$M1 : Y_{ijkv} = \mu + pos_i + gel_j + dose_k + \{pos \cdot gel\}_{ij} + \{pos \cdot dose\}_{ik} + \{gel \cdot dose\}_{jk} + \epsilon_{ijkv}$$

Where  $Y_{ijkv}$  was the measured activity of position  $i$ , gel  $j$ , dose  $k$  and repetition  $v$ .  $\epsilon_{ijkv}$  was the error and  $\mu$  the overall mean. Backwards elimination was performed down to the model only including main effects:

$$M2 : Y_{ijkv} = \mu + pos_i + gel_j + dose_k + \epsilon_{ijkv}$$

Then a testing of the main effects was performed, down to having only the dose included, as the hypothesis was, that the activity measured was only dependent on the irradiated dose:

$$M3 : Y_{ijkv} = \mu + dose_k + \epsilon_{ijkv}$$

$$M4 : Y_{ijkv} = dose_k + \epsilon_{ijkv}$$

Normality was evaluated by inspecting the residual/quantile plots. To test for equal variance the Levene's test was used [1].

Nothing suspicious was found in the residual/quantile plots and normality was accepted. Using Levene's test for equal variance<sup>1</sup>, the four dose levels 0-, 2-, 10- and 22 Gy, were found to have equal variance  $P=0.0989$ . Please note that the dose was not completely homogeneous within each group, so equal variance was accepted.

Four models were considered M1-M4 (see equations above), ranging from complex to very simple (Table S2).

**Table S2. Statistical analysis of results for each model. DF: Degrees of Freedom, RSS: Residual sum of squares, MS: Mean squared error, F: F-test value**

| Model | No. par. | DF | RSS        | MSE        | F     | P(F>f) | R <sup>2</sup> |
|-------|----------|----|------------|------------|-------|--------|----------------|
| M1    | 19       | 26 | 0.00247935 | 0.00009536 |       |        | 0.9932         |
| M2    | 11       | 34 | 0.00297182 | 0.00008741 | 0.645 | 0.733  | 0.9916         |
| M3    | 2        | 43 | 0.00643799 | 0.00014972 | 4.406 | 0.001  | 0.9825         |
| M4    | 1        | 44 | 0.00676092 | 0.00015366 | 2.157 | 0.149  | 0.9816         |

The step from M1 to M2 was not significant. The step from M2 to M3 was significant, however the decrease in R<sup>2</sup> was miniscule. Taking statistical methodology very literally, one should thus accept M2. The step from M3 to M4 was also not significant. Since the decrease in variance explained were so small, we choose to accept the simplest possible model M4 as it still maintains a R<sup>2</sup> of 0.9816. This can be interpreted as the activity measured can be adequately explained by the effective dose alone and that position in the phantom and the individual gels has a negligible effect.

To evaluate the error the irradiated dose was calculate from the activity using the model, which was grouped into the four dose levels (Table S3).

**Table S3: Error in calculated dose**

| Dose group [Gy] | Standard deviation [Gy] | Maximum lower error [Gy] | Maximum upper error [Gy] |
|-----------------|-------------------------|--------------------------|--------------------------|
| 0               | 0.927                   | -1.905                   | 1.161                    |
| 2               | 0.612                   | -1.419                   | 0.822                    |
| 10              | 0.963                   | -1.543                   | 2.189                    |
| 22              | 1.575                   | -2.462                   | 3.606                    |

## References

- [1] M. B. Brown and a B. Forsythe, "Robust Tests for Equality of Variances," *J. Am. Stat. Assoc.*, vol. 69, no. 346, pp. 364–367, 1974.
